# Supplementary material for: Between global risk reduction goals, scientific–technical capabilities and local realities: a modular approach for user-centric multi-risk assessment
Source: Copernicus journal article supplement (doi:10.5194/nhess-24-4631-2024), 2024-12-17
Supplement: Supplementary file 1 [file nhess-24-4631-2024-supplement.pdf]

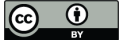

*Supplement of*

**Between global risk reduction goals, scientific–technical capabilities and local realities: a modular approach for user-centric multi-risk assessment**

**Elisabeth Schoepfer et al.**

*Correspondence to:* Elisabeth Schoepfer (elisabeth.schoepfer@dlr.de)

The copyright of individual parts of the supplement might differ from the article licence.

## 5 Supplement

The supplement shows the questionnaires that were used to obtain feedback from the user perspective on the demonstrator for a multi-risk information system during several feedback iterations: (1) a questionnaire for a *quick assessment* during workshops (years 1, 2 and 3) and (2) a questionnaire for a *detailed assessment* for participants who tested the demonstrator in practical hands-on sessions or without guidance over a period of time (years 2 and 3). Both versions of the questionnaires have been modified slightly over time to address emerging issues. The questions marked with an asterisk are shown as figures (Fig. 10 and Fig. 11) in the manuscript. It should be noted that the wording of the questions in the manuscript text has been slightly changed for a better understanding of the overall context.

15

## Questionnaire (V0.1, year 1) – Quick assessment during presence workshop

Note: In the first year a quick assessment was performed only (see manuscript for information).

### 20 Translated English version

Showcase Presentation (Prototype) - Evaluation Criteria from the Users' Perspective

|                             |                                                                                                                     | Not at all            | Very less             | Less                  | Mod-erately           | Highly                | Very highly           | Totally               |
|-----------------------------|---------------------------------------------------------------------------------------------------------------------|-----------------------|-----------------------|-----------------------|-----------------------|-----------------------|-----------------------|-----------------------|
| <b>Information content</b>  | *How <b>understandable</b> is the information presented in the prototype?                                           | <input type="radio"/> |
|                             | *How <b>relevant</b> are the layers of information displayed by the prototype for multi-risk analysis?              | <input type="radio"/> |
|                             | How <b>realistic</b> do you think the sequence demonstrated in the prototype is?                                    | <input type="radio"/> |
|                             | How <b>complete</b> is the information shown regarding the key factors of a multi-risk earthquake-tsunami scenario? | <input type="radio"/> |
| <b>Applicability</b>        | Applicability of the tool for <b>disaster risk management planning</b> (mitigation, preparedness, response)         | <input type="radio"/> |
|                             | Applicability of the tool to <b>land-use planning</b>                                                               | <input type="radio"/> |
|                             | Competence as a tool in <b>risk communication</b>                                                                   | <input type="radio"/> |
|                             | *Usefulness of the tool for <b>my practical work</b>                                                                | <input type="radio"/> |
| <b>Innovation</b>           | Does the prototype improve <b>the understanding of risk scenarios</b> compared to existing approaches and tools?    | <input type="radio"/> |
|                             | In your opinion, how innovative is the RIESGOS prototype?                                                           | <input type="radio"/> |
| <u>Additional comments:</u> |                                                                                                                     |                       |                       |                       |                       |                       |                       |                       |

## Original Spanish version

### Presentación Showcase (Prototipo) - Criterios de Evaluación desde la perspectiva de los usuarios

|                                 |                                                                                                                                             | Para nada             | Muy bajo              | Bajo                  | Medio                 | Alto                  | Muy alto              | Totalmente            |
|---------------------------------|---------------------------------------------------------------------------------------------------------------------------------------------|-----------------------|-----------------------|-----------------------|-----------------------|-----------------------|-----------------------|-----------------------|
| <b>Contenido informativo</b>    | ¿Qué tan <b>comprensible</b> es la información que se demuestra en el prototipo?                                                            | <input type="radio"/> |
|                                 | ¿Qué tan <b>relevante</b> son las capas de información mostrada por el prototipo para el análisis multirriesgo?                             | <input type="radio"/> |
|                                 | ¿Qué tan <b>realista</b> cree Ud. es la secuencia que se demuestra en el prototipo?                                                         | <input type="radio"/> |
|                                 | ¿Qué tan <b>completa</b> es la información que se muestra con respecto a los factores clave de un escenario multi-riesgo terremoto-tsunami? | <input type="radio"/> |
| <b>Aplicabilidad</b>            | Aplicabilidad de la herramienta para la planificación de la <b>gestión del riesgo de desastres</b> (mitigación, preparación, respuesta)     | <input type="radio"/> |
|                                 | Aplicabilidad de la herramienta a la <b>planificación del uso de la tierra</b>                                                              | <input type="radio"/> |
|                                 | La aptitud como herramienta en la <b>comunicación de riesgos</b>                                                                            | <input type="radio"/> |
|                                 | Utilidad de la herramienta para <b>mi trabajo práctico</b>                                                                                  | <input type="radio"/> |
| <b>Innovación</b>               | ¿Mejora el prototipo la <b>comprensión de los escenarios de riesgo</b> en comparación con enfoques y herramientas existentes?               | <input type="radio"/> |
|                                 | En su opinión, ¿qué tan <b>innovador</b> es el prototipo de RIESGOS?                                                                        | <input type="radio"/> |
| <u>Comentarios adicionales:</u> |                                                                                                                                             |                       |                       |                       |                       |                       |                       |                       |

**Questionnaire (V1.0, year 2) – Quick assessment during presence workshop**

**Translated English version**

RIESGOS: Evaluation from the perspective of users / actors in the partner country

|                            |                                                                                                                                                                                                                           | Not at all            | Very less             | Less                  | Moderately            | Highly                | Very highly           | Totally               |
|----------------------------|---------------------------------------------------------------------------------------------------------------------------------------------------------------------------------------------------------------------------|-----------------------|-----------------------|-----------------------|-----------------------|-----------------------|-----------------------|-----------------------|
| <b>Information content</b> | *How <b>understandable</b> is the information presented in the prototype?                                                                                                                                                 | <input type="radio"/> |
|                            | *How <b>relevant</b> are the layers of information displayed by the prototype for multi-risk analysis?                                                                                                                    | <input type="radio"/> |
|                            | How <b>realistic</b> do you think the sequence demonstrated in the prototype is?                                                                                                                                          | <input type="radio"/> |
|                            | *Data and results always include a level of uncertainty. Do you think it is important to visualise these <b>uncertainties</b> ?                                                                                           | <input type="radio"/> |
| <b>Applicability</b>       | *How likely are you to use the tool for your <b>practical work</b> ?                                                                                                                                                      | <input type="radio"/> |
|                            | Do you see a potential for <b>your data</b> to be displayed and used by the tool?                                                                                                                                         | <input type="radio"/> |
| <b>User interface</b>      | The demonstrator should allow users to explore the impacts of multiple natural hazards and how they interact with each other. Does the <b>sequence of processes</b> provided for this specific purpose make sense to you? | <input type="radio"/> |
|                            | How do you like the <b>visualisation</b> of information?                                                                                                                                                                  | <input type="radio"/> |
|                            | How do you like the <b>overall design of the user interface</b> ?                                                                                                                                                         | <input type="radio"/> |

30 **Your profile**

|                            |                                                       |                                           |                                                                         |                                                   |                                         |                                        |                                |
|----------------------------|-------------------------------------------------------|-------------------------------------------|-------------------------------------------------------------------------|---------------------------------------------------|-----------------------------------------|----------------------------------------|--------------------------------|
| <b>Field:</b>              | <input type="checkbox"/> Risk and disaster management | <input type="checkbox"/> Spatial planning | <input type="checkbox"/> Infrastructure (electricity, water, transport) | <input type="checkbox"/> Research and development | <input type="checkbox"/> Private sector | <input type="checkbox"/> Public sector | <input type="checkbox"/> Other |
| <b>Organisation-level:</b> | <input type="checkbox"/> Political                    | <input type="checkbox"/> Management       | <input type="checkbox"/> Operational                                    | <input type="checkbox"/> Technical / Engineering  | <input type="checkbox"/> Administration |                                        |                                |

## Original Spanish version

RIESGOS: Evaluación desde la perspectiva de los usuarios / actores en el país contraparte

|                       |                                                                                                                                                                                                                                            | Para nada             | Muy bajo              | Bajo                  | Medio                 | Alto                  | Muy alto              | Totalmente            |
|-----------------------|--------------------------------------------------------------------------------------------------------------------------------------------------------------------------------------------------------------------------------------------|-----------------------|-----------------------|-----------------------|-----------------------|-----------------------|-----------------------|-----------------------|
| Contenido informativo | ¿Qué tan <b>comprensible</b> es la información que se demuestra en el prototipo?                                                                                                                                                           | <input type="radio"/> |
|                       | ¿Qué tan <b>relevante</b> son las capas de información mostradas por el prototipo para el análisis multi-riesgo?                                                                                                                           | <input type="radio"/> |
|                       | ¿Qué tan <b>realista</b> cree Ud. es la secuencia que se demuestra en el prototipo?                                                                                                                                                        | <input type="radio"/> |
|                       | Los datos y resultados siempre incluyen un nivel de incertidumbre. ¿Cree Ud. que es importante visualizar estas <b>incertidumbres</b> ?                                                                                                    | <input type="radio"/> |
| Aplicabilidad         | ¿Cuán probable es que utilice Ud. la herramienta para su <b>trabajo práctico</b> ?                                                                                                                                                         | <input type="radio"/> |
|                       | ¿Ve Ud. un potencial para que <b>sus datos</b> sean mostrados y utilizados por la herramienta?                                                                                                                                             | <input type="radio"/> |
| Interfaz de usuario   | El demostrador debe permitir que los usuarios exploren los impactos de múltiples amenazas naturales y cómo interactúan entre sí. ¿Tiene sentido para Ud. la <b>secuencia de los procesos</b> proporcionada para este propósito específico? | <input type="radio"/> |
|                       | ¿Qué le parece la <b>visualización</b> de la información?                                                                                                                                                                                  | <input type="radio"/> |
|                       | ¿Cómo le gusta el <b>diseño general de la interfaz</b> de usuario?                                                                                                                                                                         | <input type="radio"/> |

### 35 Su Perfil

|                               |                                                          |                                                    |                                                                        |                                                     |                                         |                                         |                               |
|-------------------------------|----------------------------------------------------------|----------------------------------------------------|------------------------------------------------------------------------|-----------------------------------------------------|-----------------------------------------|-----------------------------------------|-------------------------------|
| <b>Ámbito:</b>                | <input type="checkbox"/> Gestión de riesgos de desastres | <input type="checkbox"/> Planificación territorial | <input type="checkbox"/> Infraestructura (eléctrica, agua, transporte) | <input type="checkbox"/> Investigación y desarrollo | <input type="checkbox"/> Sector privado | <input type="checkbox"/> Sector público | <input type="checkbox"/> Otro |
| <b>Nivel de organización:</b> | <input type="checkbox"/> Político                        | <input type="checkbox"/> Gestión                   | <input type="checkbox"/> Operacional                                   | <input type="checkbox"/> Técnico / Ingeniería       | <input type="checkbox"/> Administración |                                         |                               |

**Questionnaire (V1.0, year 2) – Detailed assessment during presence practical hands-on sessions**

**Translated English version**

Questionnaire - Practical use of the RIESGOS demonstrator

40

**Your profile**

|                                      |                                                       |                                           |                                                                         |                                                   |                                         |                                        |                                |
|--------------------------------------|-------------------------------------------------------|-------------------------------------------|-------------------------------------------------------------------------|---------------------------------------------------|-----------------------------------------|----------------------------------------|--------------------------------|
| <b>Field:</b>                        | <input type="checkbox"/> Risk and disaster management | <input type="checkbox"/> Spatial planning | <input type="checkbox"/> Infrastructure (electricity, water, transport) | <input type="checkbox"/> Research and development | <input type="checkbox"/> Private sector | <input type="checkbox"/> Public sector | <input type="checkbox"/> Other |
| <b>Organisation-level:</b>           | <input type="checkbox"/> Political                    | <input type="checkbox"/> Management       | <input type="checkbox"/> Operational                                    | <input type="checkbox"/> Technical / Engineering  | <input type="checkbox"/> Administration |                                        |                                |
| <b>Spatial / geographical level:</b> | <input type="checkbox"/> National                     | <input type="checkbox"/> Regional         | <input type="checkbox"/> Local                                          | <input type="checkbox"/> Not applicable           |                                         |                                        |                                |

**Information content**

|   |                                                                                                                                                                                                                                                                                                                                                                                                                                                                                        | Yes                   | Partly                | No                    | Not applicable        |
|---|----------------------------------------------------------------------------------------------------------------------------------------------------------------------------------------------------------------------------------------------------------------------------------------------------------------------------------------------------------------------------------------------------------------------------------------------------------------------------------------|-----------------------|-----------------------|-----------------------|-----------------------|
| 1 | Is the information displayed in the demonstrator <b>comprehensible</b> ?                                                                                                                                                                                                                                                                                                                                                                                                               | <input type="radio"/> | <input type="radio"/> | <input type="radio"/> | <input type="radio"/> |
| 2 | If not, please specify what you did not understand                                                                                                                                                                                                                                                                                                                                                                                                                                     |                       |                       |                       |                       |
| 3 | Is the information shown in the demonstrator <b>relevant</b> to multi-risk analysis?                                                                                                                                                                                                                                                                                                                                                                                                   | <input type="radio"/> | <input type="radio"/> | <input type="radio"/> | <input type="radio"/> |
| 4 | Did you have access to the information you expected to receive?                                                                                                                                                                                                                                                                                                                                                                                                                        | <input type="radio"/> | <input type="radio"/> | <input type="radio"/> | <input type="radio"/> |
| 5 | Was any information missing?                                                                                                                                                                                                                                                                                                                                                                                                                                                           | <input type="radio"/> | <input type="radio"/> | <input type="radio"/> | <input type="radio"/> |
| 6 | Which one(s)?                                                                                                                                                                                                                                                                                                                                                                                                                                                                          |                       |                       |                       |                       |
| 7 | Do you think the information shown is <b>reasonable</b> ?                                                                                                                                                                                                                                                                                                                                                                                                                              | <input type="radio"/> | <input type="radio"/> | <input type="radio"/> | <input type="radio"/> |
| 8 | If not, why not?                                                                                                                                                                                                                                                                                                                                                                                                                                                                       |                       |                       |                       |                       |
| 9 | Uncertainties have different causes. On the one hand, they arise due to the simplified representation of complex natural processes by models. On the other hand, these models often do not sufficiently consider the spatial and temporal heterogeneity of the natural processes to be represented. Other uncertainties may result from measurement and estimation errors in the recording of model parameters. Do you think it is important to visualise these <b>uncertainties</b> ? | <input type="radio"/> | <input type="radio"/> | <input type="radio"/> | <input type="radio"/> |

## Applicability

|    |                                                                                                              | Yes                   | Partly                | No                    | Not applicable        |
|----|--------------------------------------------------------------------------------------------------------------|-----------------------|-----------------------|-----------------------|-----------------------|
| 10 | Is it likely that you will use the demonstrator for your practical work?                                     | <input type="radio"/> | <input type="radio"/> | <input type="radio"/> | <input type="radio"/> |
| 11 | Are the different processes connected in the demonstrator useful (do they add value) to your practical work? | <input type="radio"/> | <input type="radio"/> | <input type="radio"/> | <input type="radio"/> |
| 12 | Which ones in particular? Which ones are not?                                                                |                       |                       |                       |                       |
| 13 | How is the applicability for spatial planning at national, regional and local level?                         | <input type="radio"/> | <input type="radio"/> | <input type="radio"/> | <input type="radio"/> |
| 14 | How is the applicability for civil protection/emergency management at national, regional and local level?    | <input type="radio"/> | <input type="radio"/> | <input type="radio"/> | <input type="radio"/> |
| 15 | Does the demonstrator conform to your operational protocols?                                                 | <input type="radio"/> | <input type="radio"/> | <input type="radio"/> | <input type="radio"/> |
| 16 | If yes, which ones, how, if not, why?                                                                        |                       |                       |                       |                       |
| 17 | Do you see a potential for your data to be displayed and used in the demonstrator?                           | <input type="radio"/> | <input type="radio"/> | <input type="radio"/> | <input type="radio"/> |
| 18 | If yes, what kind of data?                                                                                   |                       |                       |                       |                       |

## 45 User interface

|    |                                                                                                                                                                                                    | Yes                   | Partly                | No                    | Not applicable        |
|----|----------------------------------------------------------------------------------------------------------------------------------------------------------------------------------------------------|-----------------------|-----------------------|-----------------------|-----------------------|
| 19 | The purpose of the demonstrator is to allow users to study the effects of multiple natural hazards and how they interact with each other. Is the <b>workflow</b> provided useful for this purpose? | <input type="radio"/> | <input type="radio"/> | <input type="radio"/> | <input type="radio"/> |
| 20 | If not, why not? How could navigation through the workflow be improved?                                                                                                                            |                       |                       |                       |                       |
| 21 | Do you like the <b>visualisation</b> of the information displayed?                                                                                                                                 | <input type="radio"/> | <input type="radio"/> | <input type="radio"/> | <input type="radio"/> |
| 22 | If so, which visualisations did you like?                                                                                                                                                          |                       |                       |                       |                       |
| 23 | Did you use the provided layer settings (e.g. opacity, change the order of displayed products, etc.)?                                                                                              | <input type="radio"/> | <input type="radio"/> | <input type="radio"/> | <input type="radio"/> |
| 24 | If yes, why?                                                                                                                                                                                       |                       |                       |                       |                       |
| 25 | Do you like the <b>overall design of the user interface</b> ?                                                                                                                                      | <input type="radio"/> | <input type="radio"/> | <input type="radio"/> | <input type="radio"/> |



|    |                                                                                                                                                                                                                                                   |                       |                       |                       |                       |
|----|---------------------------------------------------------------------------------------------------------------------------------------------------------------------------------------------------------------------------------------------------|-----------------------|-----------------------|-----------------------|-----------------------|
| 26 | If not, why not?                                                                                                                                                                                                                                  |                       |                       |                       |                       |
| 27 | Would you like to have more <b>flexibility in customising</b> the demonstrator?                                                                                                                                                                   | <input type="radio"/> | <input type="radio"/> | <input type="radio"/> | <input type="radio"/> |
| 28 | If yes, where?                                                                                                                                                                                                                                    |                       |                       |                       |                       |
| 29 | As mentioned above, data always include a level of uncertainty. If you think it is important to visualise these uncertainties, do you have visualisation techniques in mind that you are used to or that you would like the demonstrator to show? | <input type="radio"/> | <input type="radio"/> | <input type="radio"/> | <input type="radio"/> |
| 30 | If yes, which ones?                                                                                                                                                                                                                               |                       |                       |                       |                       |
| 31 | Do you see the demonstrator as a <b>technological innovation</b> rather than a combination of current technologies?                                                                                                                               | <input type="radio"/> | <input type="radio"/> | <input type="radio"/> | <input type="radio"/> |
| 32 | If not, why not?                                                                                                                                                                                                                                  |                       |                       |                       |                       |

### Usability

|    |                                                                                                              | Yes                   | Partly                | No                    | Not applicable        |
|----|--------------------------------------------------------------------------------------------------------------|-----------------------|-----------------------|-----------------------|-----------------------|
| 33 | Is the <b>demonstrator easy to use</b> ?                                                                     | <input type="radio"/> | <input type="radio"/> | <input type="radio"/> | <input type="radio"/> |
| 34 | If not, why not?                                                                                             |                       |                       |                       |                       |
| 35 | Have you been able to <b>follow all the steps</b> and execute all the processes of the multi-risk sequence?  | <input type="radio"/> | <input type="radio"/> | <input type="radio"/> | <input type="radio"/> |
| 36 | If not, why not?                                                                                             |                       |                       |                       |                       |
| 37 | Did you feel in good <b>control of the interaction</b> (also moving backwards and forwards in the workflow)? | <input type="radio"/> | <input type="radio"/> | <input type="radio"/> | <input type="radio"/> |
| 38 | If not, why not?                                                                                             |                       |                       |                       |                       |
| 39 | Did you <b>experience any errors</b> or receive any error messages while using the demonstrator?             | <input type="radio"/> | <input type="radio"/> | <input type="radio"/> | <input type="radio"/> |
| 40 | If so, which ones?                                                                                           |                       |                       |                       |                       |

**Overall satisfaction**

|    |                        |
|----|------------------------|
| 41 | What did you like?     |
| 42 | What did you not like? |
| 43 | What was missing?      |

50

**Thank you very much for your feedback!**

## Original Spanish version

### Cuestionario - Uso práctico del demostrador RIESGOS

55

#### Su Perfil

|                                      |                                                         |                                                    |                                                                        |                                                 |                                         |                                         |                               |
|--------------------------------------|---------------------------------------------------------|----------------------------------------------------|------------------------------------------------------------------------|-------------------------------------------------|-----------------------------------------|-----------------------------------------|-------------------------------|
| <b>Ámbito:</b>                       | <input type="checkbox"/> Gestión de riesgos y desastres | <input type="checkbox"/> Planificación territorial | <input type="checkbox"/> Infraestructura (eléctrica, agua, transporte) | <input type="checkbox"/> Inversión y desarrollo | <input type="checkbox"/> Sector privado | <input type="checkbox"/> Sector público | <input type="checkbox"/> Otro |
| <b>Nivel de organización:</b>        | <input type="checkbox"/> Político                       | <input type="checkbox"/> Gestión                   | <input type="checkbox"/> Operacional                                   | <input type="checkbox"/> Técnico / Ingeniería   | <input type="checkbox"/> Administración |                                         |                               |
| <b>Nivel espacial / territorial:</b> | <input type="checkbox"/> Nacional                       | <input type="checkbox"/> Regional                  | <input type="checkbox"/> Local                                         | <input type="checkbox"/> No aplicable           |                                         |                                         |                               |

#### Contenido informativo

|   |                                                                                                                                                                                                                                                                                                                                                                                                                                                                                                                             | Sí                    | En parte              | No                    | No aplicable          |
|---|-----------------------------------------------------------------------------------------------------------------------------------------------------------------------------------------------------------------------------------------------------------------------------------------------------------------------------------------------------------------------------------------------------------------------------------------------------------------------------------------------------------------------------|-----------------------|-----------------------|-----------------------|-----------------------|
| 1 | ¿Es <b>comprensible</b> la información mostrada por el demostrador?                                                                                                                                                                                                                                                                                                                                                                                                                                                         | <input type="radio"/> | <input type="radio"/> | <input type="radio"/> | <input type="radio"/> |
| 2 | Si no, por favor especifique lo que no entendió                                                                                                                                                                                                                                                                                                                                                                                                                                                                             |                       |                       |                       |                       |
| 3 | ¿Es <b>relevante</b> para el análisis multi-riesgo la información mostrada por el demostrador?                                                                                                                                                                                                                                                                                                                                                                                                                              | <input type="radio"/> | <input type="radio"/> | <input type="radio"/> | <input type="radio"/> |
| 4 | ¿Tuvo acceso a la información que esperaba recibir?                                                                                                                                                                                                                                                                                                                                                                                                                                                                         | <input type="radio"/> | <input type="radio"/> | <input type="radio"/> | <input type="radio"/> |
| 5 | ¿Faltaba alguna información?                                                                                                                                                                                                                                                                                                                                                                                                                                                                                                | <input type="radio"/> | <input type="radio"/> | <input type="radio"/> | <input type="radio"/> |
| 6 | ¿Cuál(es)?                                                                                                                                                                                                                                                                                                                                                                                                                                                                                                                  |                       |                       |                       |                       |
| 7 | ¿Cree que la información mostrada es <b>plausible</b> ?                                                                                                                                                                                                                                                                                                                                                                                                                                                                     | <input type="radio"/> | <input type="radio"/> | <input type="radio"/> | <input type="radio"/> |
| 8 | Si no, ¿por qué?                                                                                                                                                                                                                                                                                                                                                                                                                                                                                                            |                       |                       |                       |                       |
| 9 | Las incertidumbres tienen diferentes causas. Por un lado, surgen debido a la representación simplificada de procesos naturales complejos mediante modelos. Por otro lado, estos modelos a menudo no tienen suficientemente en cuenta la heterogeneidad espacial y temporal de los procesos naturales que deben representarse. Otras incertidumbres pueden resultar de errores de medición y estimación en el registro de los parámetros del modelo. ¿Cree que es importante <i>visualizar</i> estas <b>incertidumbres</b> ? | <input type="radio"/> | <input type="radio"/> | <input type="radio"/> | <input type="radio"/> |

60 **Aplicabilidad**

|    |                                                                                                                       | <b>Sí</b>             | <b>En parte</b>       | <b>No</b>             | <b>No aplicable</b>   |
|----|-----------------------------------------------------------------------------------------------------------------------|-----------------------|-----------------------|-----------------------|-----------------------|
| 10 | ¿Es probable que utilice el demostrador para <b>su trabajo práctico</b> ?                                             | <input type="radio"/> | <input type="radio"/> | <input type="radio"/> | <input type="radio"/> |
| 11 | ¿Los diferentes procesos conectados en el demostrador son útiles (aportan un valor añadido) para su trabajo práctico? | <input type="radio"/> | <input type="radio"/> | <input type="radio"/> | <input type="radio"/> |
| 12 | ¿Cuáles en particular? ¿Cuáles no lo son?                                                                             |                       |                       |                       |                       |
| 13 | ¿Cómo es la aplicabilidad para la planificación territorial a nivel nacional, regional y local?                       | <input type="radio"/> | <input type="radio"/> | <input type="radio"/> | <input type="radio"/> |
| 14 | ¿Cómo es la aplicabilidad para la protección civil/gestión de emergencias a nivel nacional, regional y local?         | <input type="radio"/> | <input type="radio"/> | <input type="radio"/> | <input type="radio"/> |
| 15 | ¿El demostrador se ajusta a sus protocolos operativos?                                                                | <input type="radio"/> | <input type="radio"/> | <input type="radio"/> | <input type="radio"/> |
| 16 | En caso afirmativo, ¿cuáles? ¿Cómo? Si no, ¿por qué?                                                                  |                       |                       |                       |                       |
| 17 | ¿Ve un potencial para que <b>sus datos</b> sean mostrados y utilizados por el demostrador?                            | <input type="radio"/> | <input type="radio"/> | <input type="radio"/> | <input type="radio"/> |
| 18 | En caso afirmativo, ¿qué tipo de datos?                                                                               |                       |                       |                       |                       |

**Interfaz de usuario**

|    |                                                                                                                                                                                                                                       | <b>Sí</b>             | <b>En parte</b>       | <b>No</b>             | <b>No aplicable</b>   |
|----|---------------------------------------------------------------------------------------------------------------------------------------------------------------------------------------------------------------------------------------|-----------------------|-----------------------|-----------------------|-----------------------|
| 19 | El propósito del demostrador es permitir a los usuarios explorar los impactos de múltiples amenazas naturales y cómo interactúan entre sí. ¿Le parece que el <b>flujo de trabajo</b> proporcionado tiene sentido para este propósito? | <input type="radio"/> | <input type="radio"/> | <input type="radio"/> | <input type="radio"/> |
| 20 | Si no, ¿por qué? ¿Cómo se podría mejorar la navegación a través del flujo de trabajo?                                                                                                                                                 |                       |                       |                       |                       |
| 21 | ¿Le gusta la <b>visualización</b> de la información mostrada?                                                                                                                                                                         | <input type="radio"/> | <input type="radio"/> | <input type="radio"/> | <input type="radio"/> |
| 22 | En caso afirmativo, ¿qué visualizaciones le gustan?                                                                                                                                                                                   |                       |                       |                       |                       |
| 23 | ¿Utilizó la configuración de capas proporcionada (p.ej. opacidad, cambiar el orden de los productos visualizados, etc.)?                                                                                                              | <input type="radio"/> | <input type="radio"/> | <input type="radio"/> | <input type="radio"/> |
| 24 | Si no, ¿por qué?                                                                                                                                                                                                                      |                       |                       |                       |                       |
| 25 | ¿Le gusta el <b>diseño general de la interfaz de usuario</b> ?                                                                                                                                                                        | <input type="radio"/> | <input type="radio"/> | <input type="radio"/> | <input type="radio"/> |

|    |                                                                                                                                                                                                                                                                                        |                       |                       |                       |                       |
|----|----------------------------------------------------------------------------------------------------------------------------------------------------------------------------------------------------------------------------------------------------------------------------------------|-----------------------|-----------------------|-----------------------|-----------------------|
| 26 | Si no, ¿por qué?                                                                                                                                                                                                                                                                       |                       |                       |                       |                       |
| 27 | ¿Le gustaría tener más flexibilidad en la customización del demostrador?                                                                                                                                                                                                               | <input type="radio"/> | <input type="radio"/> | <input type="radio"/> | <input type="radio"/> |
| 28 | En caso afirmativo, ¿dónde?                                                                                                                                                                                                                                                            |                       |                       |                       |                       |
| 29 | Como se ha mencionado anteriormente, los datos siempre incluyen un nivel de incertidumbre. Si piensa que es importante visualizar estas incertidumbres, ¿tiene técnicas de visualización en mente a las que usted está acostumbrado o que le gustaría que el demostrador las mostrara? | <input type="radio"/> | <input type="radio"/> | <input type="radio"/> | <input type="radio"/> |
| 30 | En caso afirmativo, ¿cuáles?                                                                                                                                                                                                                                                           |                       |                       |                       |                       |
| 31 | ¿Considera el demostrador como una innovación tecnológica, que es más de una combinación de las tecnologías actuales?                                                                                                                                                                  | <input type="radio"/> | <input type="radio"/> | <input type="radio"/> | <input type="radio"/> |
| 32 | Si no, ¿por qué?                                                                                                                                                                                                                                                                       |                       |                       |                       |                       |

#### Usabilidad

|    |                                                                                                          | Sí                    | En parte              | No                    | No aplicable          |
|----|----------------------------------------------------------------------------------------------------------|-----------------------|-----------------------|-----------------------|-----------------------|
| 33 | ¿Es fácil de usar el demostrador?                                                                        | <input type="radio"/> | <input type="radio"/> | <input type="radio"/> | <input type="radio"/> |
| 34 | Si no, ¿por qué?                                                                                         |                       |                       |                       |                       |
| 35 | ¿Podría seguir todos los pasos y ejecutar todos los procesos de la secuencia multi-riesgo?               | <input type="radio"/> | <input type="radio"/> | <input type="radio"/> | <input type="radio"/> |
| 36 | Si no, ¿por qué?                                                                                         |                       |                       |                       |                       |
| 37 | ¿Se sintió en buen control de la interacción (también retrocediendo y avanzando en el flujo de trabajo)? | <input type="radio"/> | <input type="radio"/> | <input type="radio"/> | <input type="radio"/> |
| 38 | Si no, ¿por qué?                                                                                         |                       |                       |                       |                       |
| 39 | ¿Experimentó algún error o recibió algún mensaje de error mientras utilizaba el demostrador?             | <input type="radio"/> | <input type="radio"/> | <input type="radio"/> | <input type="radio"/> |
| 40 | En caso afirmativo, ¿cuáles?                                                                             |                       |                       |                       |                       |

65 **Satisfacción general**

|    |                   |
|----|-------------------|
| 41 | ¿Qué le gustó?    |
| 42 | ¿Qué no le gustó? |
| 43 | ¿Qué le faltó?    |

**¡Muchas gracias por su retroalimentación!**

Questionnaire (V2.0, year 3) – Quick assessment during online workshop

70

Translated English version

RIESGOS: Evaluation from the perspective of users / actors in the partner country

|                           |                                                                                                                                                  | Not at all            | Very less             | Less                  | Mod-erately           | Highly                | Very highly           | Totally               |
|---------------------------|--------------------------------------------------------------------------------------------------------------------------------------------------|-----------------------|-----------------------|-----------------------|-----------------------|-----------------------|-----------------------|-----------------------|
| Information content       | *How <b>understandable</b> is the information presented in the demonstrator?                                                                     | <input type="radio"/> |
|                           | *How high is the <b>added value of the information</b> compared to existing information systems?                                                 | <input type="radio"/> |
|                           | *Data and results always include a level of uncertainty. Do you think it is important to visualise these <b>uncertainties</b> ?                  | <input type="radio"/> |
| User interface            | How familiar are you with the <b>use of geographic information systems</b> ?                                                                     | <input type="radio"/> |
|                           | How much do you like the overall <b>design of the user interface</b> ?                                                                           | <input type="radio"/> |
|                           | What do you think of the <b>visualisation</b> of information?                                                                                    | <input type="radio"/> |
| Usability / Applicability | How important do you consider the possibility of <b>exploring different multi-risk scenarios</b> and their impacts for risk management?          | <input type="radio"/> |
|                           | Do you consider it useful as a tool in <b>risk communication</b> to improve understanding of multi-risk situations and associated uncertainties? | <input type="radio"/> |
|                           | *How useful do you consider the tool for your <b>practical work</b> ?                                                                            | <input type="radio"/> |

|                                     |                                                                                                                                       | Yes                   | Maybe                 | No                    | Question not applicable |
|-------------------------------------|---------------------------------------------------------------------------------------------------------------------------------------|-----------------------|-----------------------|-----------------------|-------------------------|
| <b>Future practical application</b> | Do you think it makes sense to <b>invest in the development of the demonstrator</b> to make it fit for practical use in your country? | <input type="radio"/> | <input type="radio"/> | <input type="radio"/> | <input type="radio"/>   |
|                                     | Would you be interested in integrating your data or models through your <b>own web services</b> ?                                     | <input type="radio"/> | <input type="radio"/> | <input type="radio"/> | <input type="radio"/>   |
|                                     | Would you <b>actively contribute</b> to the development of an operational system for your country?                                    | <input type="radio"/> | <input type="radio"/> | <input type="radio"/> | <input type="radio"/>   |



**Original Spanish version**

RIESGOS: Evaluación desde la perspectiva de los usuarios / actores en el país contraparte

|                                 |                                                                                                                                                                             | <b>Para nada</b>      | <b>Muy bajo</b>       | <b>Bajo</b>           | <b>Medio</b>          | <b>Alto</b>           | <b>Muy alto</b>       | <b>Totalmente</b>     |
|---------------------------------|-----------------------------------------------------------------------------------------------------------------------------------------------------------------------------|-----------------------|-----------------------|-----------------------|-----------------------|-----------------------|-----------------------|-----------------------|
| <b>Contenido informativo</b>    | ¿Qué tan <b>comprensible</b> es la información que se demuestra en el demostrador?                                                                                          | <input type="radio"/> |
|                                 | ¿Qué tan alto es el <b>valor agregado de la información</b> en comparación con sistemas de información existentes?                                                          | <input type="radio"/> |
|                                 | Los datos y resultados siempre incluyen un nivel de incertidumbre. ¿Cree Ud. que es importante visualizar estas <b>incertidumbres</b> ?                                     | <input type="radio"/> |
| <b>Interfaz de usuario</b>      | ¿Qué tan familiarizado está Ud. con el <b>uso de los sistemas de información geográfica</b> ?                                                                               | <input type="radio"/> |
|                                 | ¿Cómo le gusta el <b>diseño general de la interfaz</b> de usuario?                                                                                                          | <input type="radio"/> |
|                                 | ¿Qué le parece la <b>visualización</b> de la información?                                                                                                                   | <input type="radio"/> |
| <b>Utilidad / Aplicabilidad</b> | ¿Qué tan importante considera la posibilidad de <b>explorar diferentes escenarios multi-riesgo</b> y sus impactos para la gestión de riesgos?                               | <input type="radio"/> |
|                                 | ¿Cómo considera la utilidad como herramienta en la <b>comunicación de riesgos</b> para mejorar el entendimiento de situaciones multi-riesgo y las incertidumbres asociadas? | <input type="radio"/> |
|                                 | ¿Cómo considera la utilidad de la herramienta para su <b>trabajo práctico</b> ?                                                                                             | <input type="radio"/> |

|                            |                                                                                                                              | Sí                    | Tal vez               | No                    | Pregunta no aplicable |
|----------------------------|------------------------------------------------------------------------------------------------------------------------------|-----------------------|-----------------------|-----------------------|-----------------------|
| Aplicación práctica futura | ¿Cree que tiene sentido <b>invertir en el desarrollo del demostrador</b> para que esté apto para su uso práctico en su país? | <input type="radio"/> | <input type="radio"/> | <input type="radio"/> | <input type="radio"/> |
|                            | ¿Estaría interesado en integrar sus datos o modelos a través de sus <b>propios servicios web</b> ?                           | <input type="radio"/> | <input type="radio"/> | <input type="radio"/> | <input type="radio"/> |
|                            | ¿Usted <b>contribuiría activamente</b> al desarrollo de un sistema operacional para su país?                                 | <input type="radio"/> | <input type="radio"/> | <input type="radio"/> | <input type="radio"/> |

**Translated English version****Your feedback on the RIESGOS demonstrator**

Please share your experience with us through this survey.

90

About this survey:

You had the opportunity to test the demonstrator - thank you very much for your active participation! Now we would like to know what we can do to make the demonstrator even more useful and user-friendly. For this purpose, we have developed a questionnaire that addresses seven topics:

95

1. Your profile: data and work experience
2. Information content of the demonstrator
3. Usefulness / applicability of the demonstrator
4. User interface of the demonstrator
5. Demonstrator usability
6. Your overall satisfaction with the demonstrator
7. Towards a future practical application in your country

100

We would be grateful if you could take the time to answer these questions. This should not take more than 15-20 minutes. The evaluation of the answers is anonymous. The RIESGOS team is looking forward to your answers and will take them into account in the future development of the demonstrator.

105

**Your profile**

| <b>In what field do you work?</b>                        |                                                       |                                           |                                                                         |                                                   |                                         |                                        |                                |
|----------------------------------------------------------|-------------------------------------------------------|-------------------------------------------|-------------------------------------------------------------------------|---------------------------------------------------|-----------------------------------------|----------------------------------------|--------------------------------|
| <b>Field:</b>                                            | <input type="checkbox"/> Risk and disaster management | <input type="checkbox"/> Spatial planning | <input type="checkbox"/> Infrastructure (electricity, water, transport) | <input type="checkbox"/> Research and development | <input type="checkbox"/> Private sector | <input type="checkbox"/> Public sector | <input type="checkbox"/> Other |
| <b>On which organisational level do you work?</b>        |                                                       |                                           |                                                                         |                                                   |                                         |                                        |                                |
| <b>Organisational level:</b>                             | <input type="checkbox"/> Political                    | <input type="checkbox"/> Management       | <input type="checkbox"/> Operational                                    | <input type="checkbox"/> Technical / Engineering  | <input type="checkbox"/> Administration | <input type="checkbox"/> Research      | <input type="checkbox"/> Other |
| <b>In which geographical context do you mainly work?</b> |                                                       |                                           |                                                                         |                                                   |                                         |                                        |                                |
| <b>Spatial / geographical level:</b>                     | <input type="checkbox"/> National                     | <input type="checkbox"/> Regional         | <input type="checkbox"/> Local                                          | <input type="checkbox"/> Not applicable           |                                         |                                        |                                |

### Information content of the demonstrator

|    |                                                                                                                                                                                                                                                                                                                                                                                                                                                                                        | Yes                   | Partly                | No                    | Not applicable        |
|----|----------------------------------------------------------------------------------------------------------------------------------------------------------------------------------------------------------------------------------------------------------------------------------------------------------------------------------------------------------------------------------------------------------------------------------------------------------------------------------------|-----------------------|-----------------------|-----------------------|-----------------------|
| 1  | Is the information displayed <b>comprehensible</b> ?                                                                                                                                                                                                                                                                                                                                                                                                                                   | <input type="radio"/> | <input type="radio"/> | <input type="radio"/> | <input type="radio"/> |
| 2  | If not, please specify what you did not understand.                                                                                                                                                                                                                                                                                                                                                                                                                                    |                       |                       |                       |                       |
| 3  | Is the information shown <b>relevant</b> to multi-risk analysis?                                                                                                                                                                                                                                                                                                                                                                                                                       | <input type="radio"/> | <input type="radio"/> | <input type="radio"/> | <input type="radio"/> |
| 4  | Did you have access to the information you expected to receive?                                                                                                                                                                                                                                                                                                                                                                                                                        | <input type="radio"/> | <input type="radio"/> | <input type="radio"/> | <input type="radio"/> |
| 5  | What kind of information is missing?                                                                                                                                                                                                                                                                                                                                                                                                                                                   |                       |                       |                       |                       |
| 6  | Do you think the information shown is reasonable?                                                                                                                                                                                                                                                                                                                                                                                                                                      | <input type="radio"/> | <input type="radio"/> | <input type="radio"/> | <input type="radio"/> |
| 7  | If not, what did you find unreasonable?                                                                                                                                                                                                                                                                                                                                                                                                                                                |                       |                       |                       |                       |
| 8  | Uncertainties have different causes. On the one hand, they arise due to the simplified representation of complex natural processes by models. On the other hand, these models often do not sufficiently consider the spatial and temporal heterogeneity of the natural processes to be represented. Other uncertainties may result from measurement and estimation errors in the recording of model parameters. Do you think it is important to visualise these <b>uncertainties</b> ? | <input type="radio"/> | <input type="radio"/> | <input type="radio"/> | <input type="radio"/> |
| 9  | Do you have <b>visualization techniques of uncertainty</b> in mind that you are used to?                                                                                                                                                                                                                                                                                                                                                                                               | <input type="radio"/> | <input type="radio"/> | <input type="radio"/> | <input type="radio"/> |
| 10 | Could you give any examples?                                                                                                                                                                                                                                                                                                                                                                                                                                                           |                       |                       |                       |                       |

### 110 Utility / Potential applicability

|    |                                                                                                                                                                                       | Yes                   | Partly                | No                    | Not applicable        |
|----|---------------------------------------------------------------------------------------------------------------------------------------------------------------------------------------|-----------------------|-----------------------|-----------------------|-----------------------|
| 11 | Do you see a potential for using the demonstrator for your <b>practical work</b> ?                                                                                                    | <input type="radio"/> | <input type="radio"/> | <input type="radio"/> | <input type="radio"/> |
| 12 | Is the <b>added value of the information</b> significant compared to existing information systems?                                                                                    | <input type="radio"/> | <input type="radio"/> | <input type="radio"/> | <input type="radio"/> |
| 13 | *Do you think the demonstrator could be used for <b>spatial planning</b> in the future?                                                                                               | <input type="radio"/> | <input type="radio"/> | <input type="radio"/> | <input type="radio"/> |
| 14 | *Do you see a future application of the demonstrator for <b>civil protection/risk management</b> ?                                                                                    | <input type="radio"/> | <input type="radio"/> | <input type="radio"/> | <input type="radio"/> |
| 15 | *Do you think you could use the demonstrator in <b>risk communication</b> in the future to improve understanding of multi-risk situations and the uncertainties associated with them? | <input type="radio"/> | <input type="radio"/> | <input type="radio"/> | <input type="radio"/> |

|    |                                                                                                          |                       |                       |                       |                       |
|----|----------------------------------------------------------------------------------------------------------|-----------------------|-----------------------|-----------------------|-----------------------|
| 16 | Do you see a potential for your <b>organisation's data</b> to be displayed and used in the demonstrator? | <input type="radio"/> | <input type="radio"/> | <input type="radio"/> | <input type="radio"/> |
| 17 | If so, what data could be displayed?                                                                     |                       |                       |                       |                       |

### Graphical user interface

|    |                                                                                                                                                                                                    | Yes                   | Partly                | No                    | Not applicable        |
|----|----------------------------------------------------------------------------------------------------------------------------------------------------------------------------------------------------|-----------------------|-----------------------|-----------------------|-----------------------|
| 18 | The purpose of the demonstrator is to allow users to study the effects of multiple natural hazards and how they interact with each other. Is the <b>workflow</b> provided useful for this purpose? | <input type="radio"/> | <input type="radio"/> | <input type="radio"/> | <input type="radio"/> |
| 19 | If not, what needs to be improved?                                                                                                                                                                 |                       |                       |                       |                       |
| 20 | Do you like the <b>visualisation</b> of the information displayed?                                                                                                                                 | <input type="radio"/> | <input type="radio"/> | <input type="radio"/> | <input type="radio"/> |
| 21 | If so, which visualisations did you particularly like?                                                                                                                                             |                       |                       |                       |                       |
| 22 | Which visualisations did you not like?                                                                                                                                                             |                       |                       |                       |                       |
| 23 | Did you use the provided layer settings (e.g. opacity, change the order of displayed products, etc.)?                                                                                              | <input type="radio"/> | <input type="radio"/> | <input type="radio"/> | <input type="radio"/> |
| 24 | If not, why did you not use the layer configuration feature?                                                                                                                                       |                       |                       |                       |                       |
| 25 | Do you like the <b>overall design of the user interface</b> ?                                                                                                                                      | <input type="radio"/> | <input type="radio"/> | <input type="radio"/> | <input type="radio"/> |
| 26 | If not, what did you not like about it?                                                                                                                                                            |                       |                       |                       |                       |
| 27 | Would you like to have more <b>flexibility in customising the personalisation</b> of the demonstrator?                                                                                             | <input type="radio"/> | <input type="radio"/> | <input type="radio"/> | <input type="radio"/> |
| 28 | If yes, in which part of the demonstrator would you like to have more flexibility?                                                                                                                 |                       |                       |                       |                       |
| 29 | Do you see the demonstrator as a <b>technological innovation</b> rather than a combination of current technologies?                                                                                | <input type="radio"/> | <input type="radio"/> | <input type="radio"/> | <input type="radio"/> |
| 30 | If not, what aspects do you consider innovative?                                                                                                                                                   |                       |                       |                       |                       |

**Usability**

|    |                                                                                                              | <b>Yes</b>            | <b>Partly</b>         | <b>No</b>             | <b>Not applicable</b> |
|----|--------------------------------------------------------------------------------------------------------------|-----------------------|-----------------------|-----------------------|-----------------------|
| 31 | Is the <b>demonstrator easy to use?</b>                                                                      | <input type="radio"/> | <input type="radio"/> | <input type="radio"/> | <input type="radio"/> |
| 32 | If not, what has caused the difficulties?                                                                    |                       |                       |                       |                       |
| 33 | Have you been able to <b>follow all the steps</b> and execute all the processes of the multi-risk sequence?  | <input type="radio"/> | <input type="radio"/> | <input type="radio"/> | <input type="radio"/> |
| 34 | If not, what were the problems?                                                                              |                       |                       |                       |                       |
| 35 | Did you feel in good <b>control of the interaction</b> (also moving backwards and forwards in the workflow)? | <input type="radio"/> | <input type="radio"/> | <input type="radio"/> | <input type="radio"/> |
| 36 | If not, what were the problems?                                                                              |                       |                       |                       |                       |
| 37 | Did you <b>experience any errors</b> or receive any error messages while using the demonstrator?             | <input type="radio"/> | <input type="radio"/> | <input type="radio"/> | <input type="radio"/> |
| 38 | If so, what were the errors?                                                                                 |                       |                       |                       |                       |

115 **Your overall satisfaction with the demonstrator**

|    |                        |
|----|------------------------|
| 39 | What did you like?     |
| 40 | What did you not like? |
| 41 | What was missing?      |

**Towards future practical application in your country**

120 The demonstrator is a prototype that is not yet ready for application in real planning contexts. Further development for this purpose requires partner countries to integrate and validate their own data and web services. In addition, conditions must be created for the tool to be managed independently in the partner countries in the long term.

|    |                                                                                                                                                                                          | Yes                   | Partly                | No                    | Not applicable        |
|----|------------------------------------------------------------------------------------------------------------------------------------------------------------------------------------------|-----------------------|-----------------------|-----------------------|-----------------------|
| 42 | Do you think it makes sense to <b>invest in the development of the demonstrator</b> to make it fit for practical use in your country?                                                    | <input type="radio"/> | <input type="radio"/> | <input type="radio"/> | <input type="radio"/> |
| 43 | Would you be interested in <b>integrating your organisation's data or models</b> through your <b>own web services</b> ?                                                                  | <input type="radio"/> | <input type="radio"/> | <input type="radio"/> | <input type="radio"/> |
| 44 | If yes, what kind of data or models?                                                                                                                                                     |                       |                       |                       |                       |
| 45 | If you were interested in integrating your data or models, would there be <b>technical or administrative obstacles</b> to integrating your data or models through your own web services? | <input type="radio"/> | <input type="radio"/> | <input type="radio"/> | <input type="radio"/> |
| 46 | If yes, what <b>obstacles</b> do you face (i.e. technical expertise to set up a web service / does your organisation's data policy restrict the exposure of data or models)?             |                       |                       |                       |                       |
| 47 | Are you interested and willing to <b>actively contribute to the development of an operational system</b> for your country?                                                               | <input type="radio"/> | <input type="radio"/> | <input type="radio"/> | <input type="radio"/> |
| 48 | If so, what would your contribution be?                                                                                                                                                  |                       |                       |                       |                       |

**Thank you very much for your feedback!**

125 If you have **any specific questions** about the demonstrator or the feedback process, please feel free to send an email to: [riesgos\[at\]dlr.de](mailto:riesgos[at]dlr.de)

More general information (brochures, fact sheets, publications, etc.) can be found on the **project website**: <https://www.riesgos.de/es/>

130

## Original Spanish version

### Su retroalimentación sobre el demostrador RIESGOS

Por favor, comparta su experiencia con nosotros a través de este cuestionario.

135

Acerca de esta encuesta:

Usted tuvo la oportunidad de probar el demostrador. ¡Muchas gracias por su activa participación! Ahora nos gustaría saber qué podemos hacer para que el demostrador sea aún más útil y fácil de usar. Para este fin hemos desarrollado un cuestionario que aborda siete temas:

1. Su perfil: datos y experiencia laboral
- 140 2. Contenido informativo del demostrador
3. Utilidad / aplicabilidad del demostrador
4. Interfaz de usuario del demostrador
5. Usabilidad del demostrador
6. Su satisfacción general con del demostrador
- 145 7. Hacia una futura aplicación práctica en su país

Nos agradecería que se tomara el tiempo para responder a estas preguntas. Esto no debería llevar más de 15-20 minutos. La evaluación de las respuestas es anónima. El equipo de RIESGOS está a la espera de sus respuestas y las tendrá en cuenta en el futuro desarrollo del demostrador.

#### Su Perfil

| ¿En qué ámbito trabaja usted?                              |                                                         |                                                    |                                                                        |                                                     |                                         |                                         |                               |
|------------------------------------------------------------|---------------------------------------------------------|----------------------------------------------------|------------------------------------------------------------------------|-----------------------------------------------------|-----------------------------------------|-----------------------------------------|-------------------------------|
| <b>Ámbito:</b>                                             | <input type="checkbox"/> Gestión de riesgos y desastres | <input type="checkbox"/> Planificación territorial | <input type="checkbox"/> Infraestructura (eléctrica, agua, transporte) | <input type="checkbox"/> Investigación y desarrollo | <input type="checkbox"/> Sector privado | <input type="checkbox"/> Sector público | <input type="checkbox"/> Otro |
| ¿En qué nivel organizativo trabaja?                        |                                                         |                                                    |                                                                        |                                                     |                                         |                                         |                               |
| <b>Nivel de organización:</b>                              | <input type="checkbox"/> Político                       | <input type="checkbox"/> Gestión                   | <input type="checkbox"/> Operacional                                   | <input type="checkbox"/> Técnico / Ingeniería       | <input type="checkbox"/> Administración | <input type="checkbox"/> Investigación  | <input type="checkbox"/> Otro |
| ¿En qué contexto territorial trabaja usted principalmente? |                                                         |                                                    |                                                                        |                                                     |                                         |                                         |                               |
| <b>Nivel espacial / territorial:</b>                       | <input type="checkbox"/> Nacional                       | <input type="checkbox"/> Regional                  | <input type="checkbox"/> Local                                         | <input type="checkbox"/> No aplicable               |                                         |                                         |                               |

#### 150 Contenido informativo del demostrador

|   |                                                                             | Sí                    | En parte              | No                    | No aplicable          |
|---|-----------------------------------------------------------------------------|-----------------------|-----------------------|-----------------------|-----------------------|
| 1 | ¿Es <b>comprensible</b> la información mostrada?                            | <input type="radio"/> | <input type="radio"/> | <input type="radio"/> | <input type="radio"/> |
| 2 | Si no, por favor especifique lo que no entendió.                            |                       |                       |                       |                       |
| 3 | ¿Es <b>relevante</b> para el análisis multi-riesgo la información mostrada? | <input type="radio"/> | <input type="radio"/> | <input type="radio"/> | <input type="radio"/> |



|    |                                                                                                                                                                                                                                                                                                                                                                                                                                                                                                                             |                       |                       |                       |                       |
|----|-----------------------------------------------------------------------------------------------------------------------------------------------------------------------------------------------------------------------------------------------------------------------------------------------------------------------------------------------------------------------------------------------------------------------------------------------------------------------------------------------------------------------------|-----------------------|-----------------------|-----------------------|-----------------------|
| 4  | ¿Tuvo acceso a la información que esperaba recibir?                                                                                                                                                                                                                                                                                                                                                                                                                                                                         | <input type="radio"/> | <input type="radio"/> | <input type="radio"/> | <input type="radio"/> |
| 5  | ¿Qué tipo de información falta?                                                                                                                                                                                                                                                                                                                                                                                                                                                                                             |                       |                       |                       |                       |
| 6  | ¿Cree que la información mostrada es razonable?                                                                                                                                                                                                                                                                                                                                                                                                                                                                             | <input type="radio"/> | <input type="radio"/> | <input type="radio"/> | <input type="radio"/> |
| 7  | Si no, ¿qué no le pareció razonable?                                                                                                                                                                                                                                                                                                                                                                                                                                                                                        |                       |                       |                       |                       |
| 8  | Las incertidumbres tienen diferentes causas. Por un lado, surgen debido a la representación simplificada de procesos naturales complejos mediante modelos. Por otro lado, estos modelos a menudo no tienen suficientemente en cuenta la heterogeneidad espacial y temporal de los procesos naturales que deben representarse. Otras incertidumbres pueden resultar de errores de medición y estimación en el registro de los parámetros del modelo. ¿Cree que es importante <i>visualizar</i> estas <b>incertidumbres</b> ? | <input type="radio"/> | <input type="radio"/> | <input type="radio"/> | <input type="radio"/> |
| 9  | ¿Tiene usted en mente <b>técnicas de visualización</b> de incertidumbre a las que usted está acostumbrado?                                                                                                                                                                                                                                                                                                                                                                                                                  | <input type="radio"/> | <input type="radio"/> | <input type="radio"/> | <input type="radio"/> |
| 10 | ¿Puede dar ejemplos de ello?                                                                                                                                                                                                                                                                                                                                                                                                                                                                                                |                       |                       |                       |                       |

#### Utilidad / Posible aplicabilidad

|    |                                                                                                                                                                                                | Sí                    | En parte              | No                    | No aplicable          |
|----|------------------------------------------------------------------------------------------------------------------------------------------------------------------------------------------------|-----------------------|-----------------------|-----------------------|-----------------------|
| 11 | ¿Ve un potencial que utilice el demostrador para <b>su trabajo práctico</b> ?                                                                                                                  | <input type="radio"/> | <input type="radio"/> | <input type="radio"/> | <input type="radio"/> |
| 12 | ¿Es significativo el <b>valor agregado de la información</b> en comparación con sistemas de información existentes?                                                                            | <input type="radio"/> | <input type="radio"/> | <input type="radio"/> | <input type="radio"/> |
| 13 | ¿Considera usted que en el futuro podría aplicar el demostrador para la <b>planificación territorial</b> ?                                                                                     | <input type="radio"/> | <input type="radio"/> | <input type="radio"/> | <input type="radio"/> |
| 14 | ¿Considera usted que en el futuro podría aplicar el demostrador para la <b>protección civil/gestión de riesgos</b> ?                                                                           | <input type="radio"/> | <input type="radio"/> | <input type="radio"/> | <input type="radio"/> |
| 15 | ¿Considera usted que en el futuro podría aplicar el demostrador en la <b>comunicación de riesgos</b> para mejorar el entendimiento de situaciones multi-riesgo y las incertidumbres asociadas? | <input type="radio"/> | <input type="radio"/> | <input type="radio"/> | <input type="radio"/> |
| 16 | ¿Ve un potencial para que <b>los datos de su organización</b> sean mostrados y utilizados por el demostrador?                                                                                  | <input type="radio"/> | <input type="radio"/> | <input type="radio"/> | <input type="radio"/> |
| 17 | En caso afirmativo, ¿qué datos se podrían mostrar?                                                                                                                                             |                       |                       |                       |                       |

## Interfaz de usuario

|    |                                                                                                                                                                                                                                       | Sí                    | En parte              | No                    | No aplicable          |
|----|---------------------------------------------------------------------------------------------------------------------------------------------------------------------------------------------------------------------------------------|-----------------------|-----------------------|-----------------------|-----------------------|
| 18 | El propósito del demostrador es permitir a los usuarios explorar los impactos de múltiples amenazas naturales y cómo interactúan entre sí. ¿Le parece que el <b>flujo de trabajo</b> proporcionado tiene sentido para este propósito? | <input type="radio"/> | <input type="radio"/> | <input type="radio"/> | <input type="radio"/> |
| 19 | Si no, ¿qué se debe mejorar?                                                                                                                                                                                                          |                       |                       |                       |                       |
| 20 | ¿Le gusta la <b>visualización</b> de la información mostrada?                                                                                                                                                                         | <input type="radio"/> | <input type="radio"/> | <input type="radio"/> | <input type="radio"/> |
| 21 | En caso afirmativo, ¿qué visualizaciones le gustaron particularmente?                                                                                                                                                                 |                       |                       |                       |                       |
| 22 | ¿Qué visualizaciones no le gustaron?                                                                                                                                                                                                  |                       |                       |                       |                       |
| 23 | ¿Ha utilizado la configuración de capas proporcionada (p.ej. opacidad, cambiar el orden de los productos visualizados, etc.)?                                                                                                         | <input type="radio"/> | <input type="radio"/> | <input type="radio"/> | <input type="radio"/> |
| 24 | Si no, ¿por qué no ha utilizado la funcionalidad de la configuración de capas?                                                                                                                                                        |                       |                       |                       |                       |
| 25 | ¿Le gusta el <b>diseño general de la interfaz de usuario</b> ?                                                                                                                                                                        | <input type="radio"/> | <input type="radio"/> | <input type="radio"/> | <input type="radio"/> |
| 26 | Si no, ¿qué es lo que no le ha gustado?                                                                                                                                                                                               |                       |                       |                       |                       |
| 27 | ¿Le gustaría tener más <b>flexibilidad en la customización en la personalización</b> del demostrador?                                                                                                                                 | <input type="radio"/> | <input type="radio"/> | <input type="radio"/> | <input type="radio"/> |
| 28 | En caso afirmativo, ¿en qué parte del demostrador le gustaría tener más flexibilidad?                                                                                                                                                 |                       |                       |                       |                       |
| 29 | ¿Considera que el demostrador es una <b>innovación tecnológica</b> mucho más que una combinación de las tecnologías actuales?                                                                                                         | <input type="radio"/> | <input type="radio"/> | <input type="radio"/> | <input type="radio"/> |
| 30 | Si no, ¿qué aspectos considera innovadores?                                                                                                                                                                                           |                       |                       |                       |                       |

## Usabilidad

|    |                                                                                                                 | Sí                    | En parte              | No                    | No aplicable          |
|----|-----------------------------------------------------------------------------------------------------------------|-----------------------|-----------------------|-----------------------|-----------------------|
| 31 | ¿Es <b>fácil de usar</b> el demostrador?                                                                        | <input type="radio"/> | <input type="radio"/> | <input type="radio"/> | <input type="radio"/> |
| 32 | Si no, ¿qué ha causado las dificultades?                                                                        |                       |                       |                       |                       |
| 33 | ¿Ha podido <b>seguir todos los pasos</b> y ejecutar todos los procesos de la secuencia multi-riesgo?            | <input type="radio"/> | <input type="radio"/> | <input type="radio"/> | <input type="radio"/> |
| 34 | Si no, ¿cuáles fueron los problemas?                                                                            |                       |                       |                       |                       |
| 35 | ¿Se sintió en buen <b>control de la interacción</b> (también retrocediendo y avanzando en el flujo de trabajo)? | <input type="radio"/> | <input type="radio"/> | <input type="radio"/> | <input type="radio"/> |
| 36 | Si no, ¿cuáles fueron los problemas?                                                                            |                       |                       |                       |                       |
| 37 | ¿ <b>Experimentó algún error</b> o recibió algún mensaje de error mientras utilizaba el demostrador?            | <input type="radio"/> | <input type="radio"/> | <input type="radio"/> | <input type="radio"/> |
| 38 | En caso afirmativo, ¿cuáles fueron los errores?                                                                 |                       |                       |                       |                       |

## Su satisfacción general con el demostrador

|    |                   |
|----|-------------------|
| 39 | ¿Qué le gustó?    |
| 40 | ¿Qué no le gustó? |
| 41 | ¿Qué le faltó?    |

160 **Hacia una futura aplicación práctica en su país**

El demostrador es un prototipo que todavía no está listo para su aplicación en contextos reales de planificación. Para seguir desarrollándolo para tal fin es necesario que los países asociados integren sus propios datos y servicios web y los validen. Además, deben crearse las condiciones para que la herramienta se gestione de manera independiente en los países contrapartes a largo plazo.

|    |                                                                                                                                                                                                     | Sí                    | En parte              | No                    | No aplicable          |
|----|-----------------------------------------------------------------------------------------------------------------------------------------------------------------------------------------------------|-----------------------|-----------------------|-----------------------|-----------------------|
| 42 | ¿Cree que tiene sentido <b>invertir en el desarrollo del demostrador</b> para que esté apto para su uso práctico en su país?                                                                        | <input type="radio"/> | <input type="radio"/> | <input type="radio"/> | <input type="radio"/> |
| 43 | ¿Estaría interesado en <b>integrar los datos o modelos</b> de su organización a través de sus <b>propios servicios web</b> ?                                                                        | <input type="radio"/> | <input type="radio"/> | <input type="radio"/> | <input type="radio"/> |
| 44 | En caso afirmativo, ¿qué tipo de datos o modelos?                                                                                                                                                   |                       |                       |                       |                       |
| 45 | En caso que estuviera interesado en integrar sus datos o modelos, ¿ <b>habría obstáculos</b> técnicos o administrativos para integrar sus datos o modelos a través de sus propios servicios web?    | <input type="radio"/> | <input type="radio"/> | <input type="radio"/> | <input type="radio"/> |
| 46 | En caso afirmativo, ¿qué obstáculos se enfrenta? (i.e. conocimientos técnicos para establecer un servicio web / la política de datos de su organización restringe la exposición de datos o modelos) |                       |                       |                       |                       |
| 47 | ¿Tiene interés y voluntad de <b>contribuir activamente al desarrollo de un sistema operacional</b> para su país?                                                                                    | <input type="radio"/> | <input type="radio"/> | <input type="radio"/> | <input type="radio"/> |
| 48 | En caso afirmativo, ¿cuál sería su contribución?                                                                                                                                                    |                       |                       |                       |                       |

165 **¡Muchas gracias por su retroalimentación!**

Si tiene **alguna pregunta específica** sobre el demostrador o el proceso de retroalimentación, no dude en enviar un correo electrónico a: [riesgos\[at\]dlr.de](mailto:riesgos[at]dlr.de)

170 En la **página web del proyecto** puede encontrar más información general (folletos, fichas, publicaciones, etc.): <https://www.riesgos.de/es/>
